# Supplementary material
Source: PubMed Central journal article supplement (PMC4540948)
Supplement: JCM.00893-15_zjm999094470so1.pdf [file JCM.00893-15_zjm999094470so1.pdf]

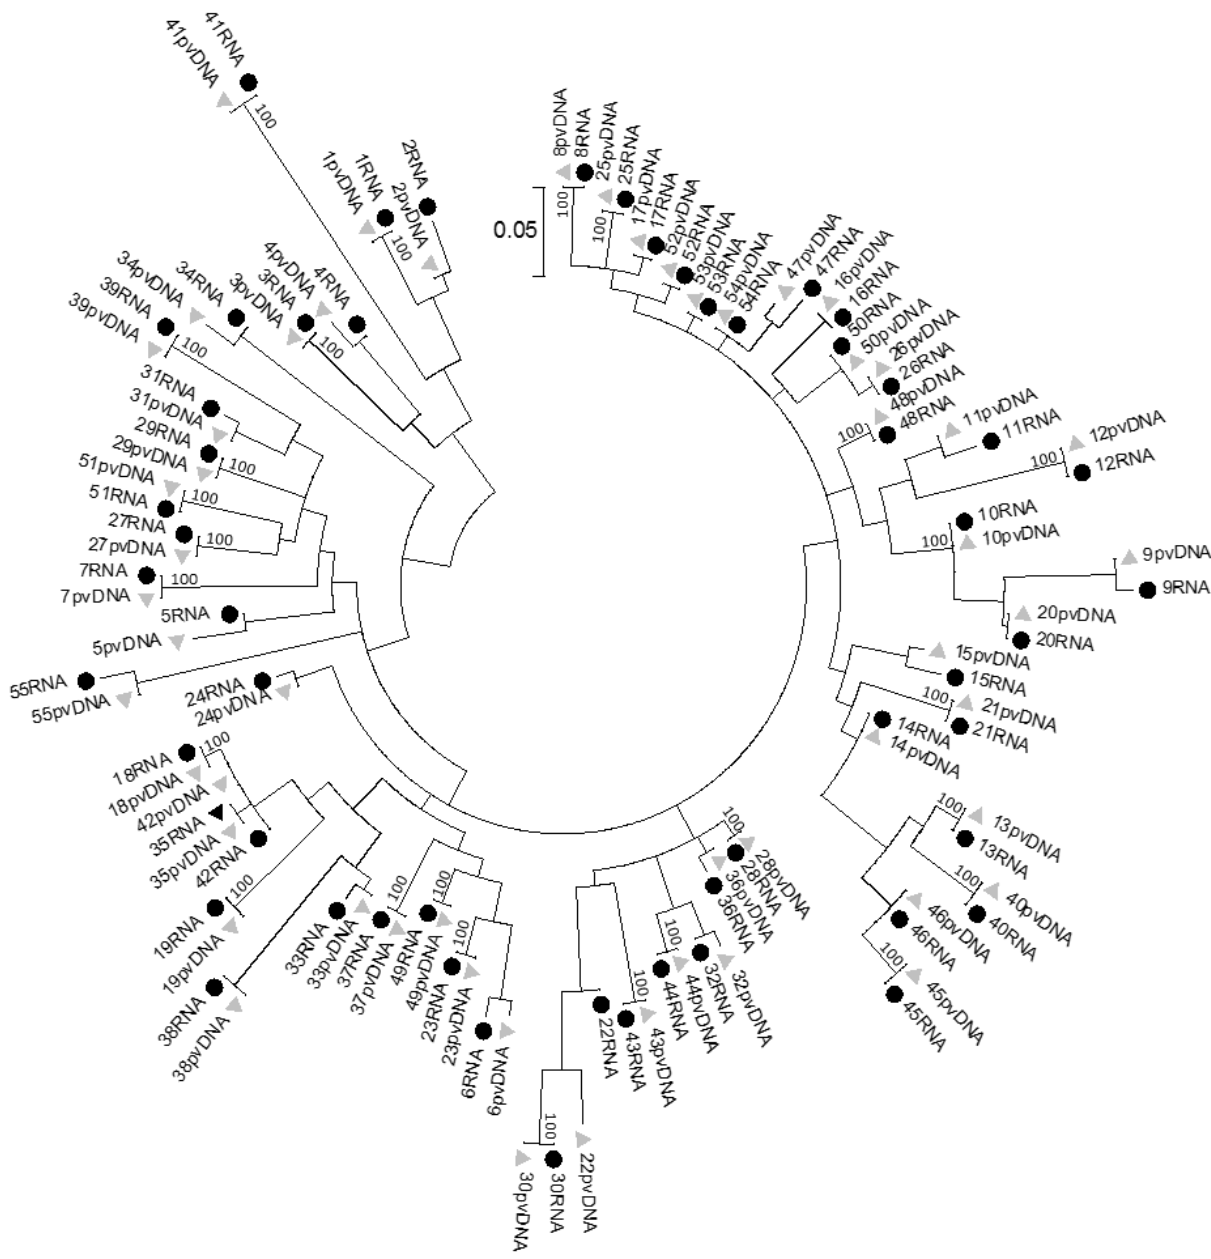

**FIG S1** Maximum likelihood (ML) tree of the 55 RNA/pvDNA paired samples. This was inferred with the Generalised Time Reversible (GTR) nucleotide substitution model with gamma-distribution of rates among site heterogeneity, a proportion of invariable sites (GTR+I+ $\Gamma_5$ ) and 1,000 bootstrap replicates. Paired samples were identified by a bootstrap support >70%. The ML phylogenetic tree was inferred with the MEGA6 software.

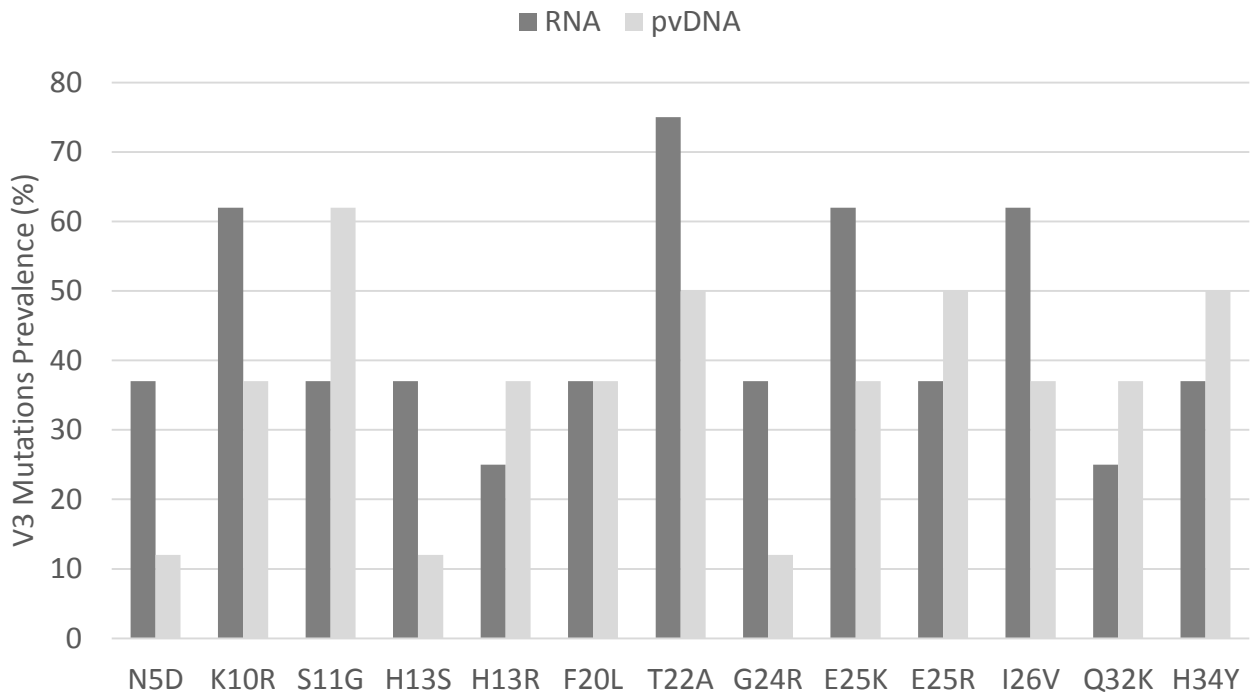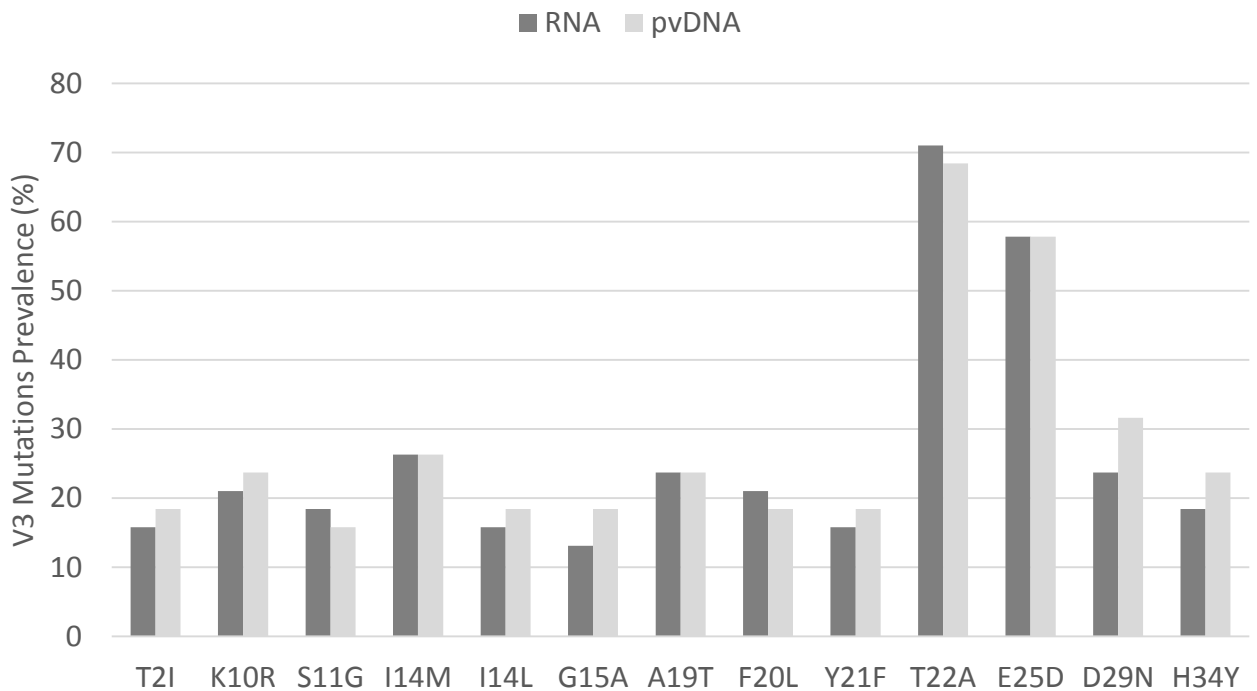

**FIG S2** Prevalence of V3 mutations in concordant DNA/RNA samples. (A) Concordant RNA/DNA samples (N=8) with X4/DM tropism. (B) Concordant RNA/DNA samples (N=38) with R5 tropism. All mutations found at the 35 V3 positions with an overall prevalence  $\geq 10\%$  were evaluated.
